# Supplementary material
Source: Springer Nature journal article supplement (https://www.springermedizin.de/resource/supplementary/12968_2013_3338_MOESM4_ESM.pdf/9583612)

**a**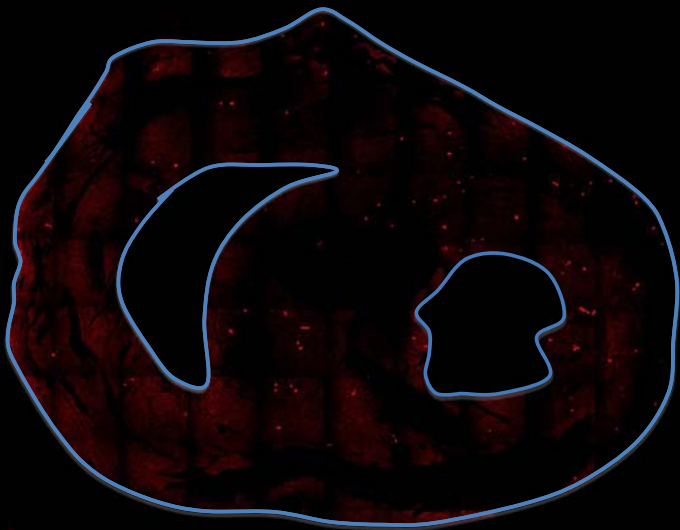**b**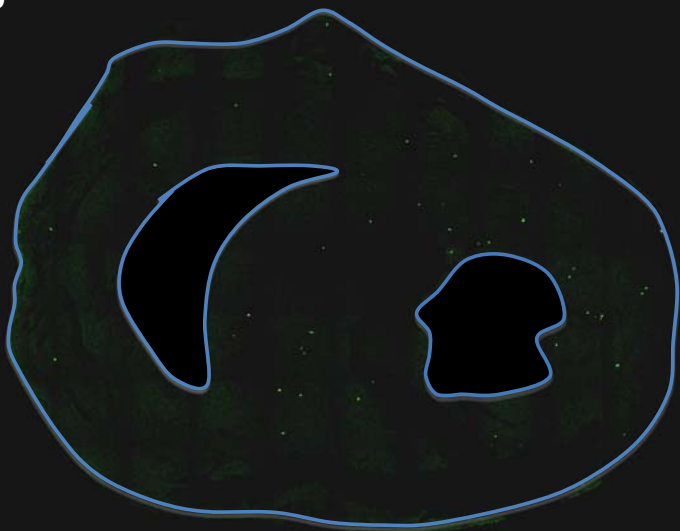

Supplement: MOESM4 [file 9583612]
